# Supplementary material for: Geometry influences inflammatory host cell response and remodeling in tissue-engineered heart valves in-vivo
Source: PubMed Central journal article supplement (PMC7669851; doi:10.1038/s41598-020-76322-9), 2020-11-16
Supplement: 41598_2020_76322_MOESM1_ESM.pdf [file 41598_2020_76322_MOESM1_ESM.pdf]

## **Geometry influences inflammatory host cell response and remodeling in tissue-engineered heart valves in vivo**

Sarah E. Motta<sup>1,2,9</sup>, Emanuela S. Fioretta<sup>1,9</sup>, Valentina Lintas<sup>2</sup>, Petra E. Dijkman<sup>1</sup>, Monika Hilbe<sup>3</sup>, Laura Frese<sup>1</sup>, Nikola Cesarovic<sup>4,5</sup>, Sandra Loerakker<sup>6,7</sup>, Frank P. T. Baaijens<sup>6</sup>, Volkmar Falk<sup>4,5,8</sup>, Simon P. Hoerstrup<sup>1,2</sup>, Maximilian Y. Emmert<sup>1,2,4,8,\*</sup>

<sup>1</sup> *Institute for Regenerative Medicine (IREM), University of Zurich, Zurich, Switzerland*

<sup>2</sup> *Wyss Translational Center Zurich, University and ETH Zurich, Zurich, Switzerland*

<sup>3</sup> *Institute of Veterinary Pathology, University of Zurich, Zurich, Switzerland*

<sup>4</sup> *Department of Cardiothoracic and Vascular Surgery, German Heart Center Berlin, Berlin, Germany*

<sup>5</sup> *Department of Health Sciences and Technology, Swiss Federal Institute of Technology, Zurich, Switzerland*

<sup>6</sup> *Department of Biomedical Engineering, Eindhoven University of Technology, Eindhoven, The Netherlands*

<sup>7</sup> *Institute for Complex Molecular Systems, Eindhoven University of Technology, The Netherlands*

<sup>8</sup> *Department of Cardiovascular Surgery, Charité Universitätsmedizin Berlin, Berlin, Germany*

<sup>9</sup>These authors contributed equally and share first authorship

### **\*Corresponding author:**

**Maximilian Y. Emmert, MD, PhD**

Institute for Regenerative Medicine (IREM), University of Zurich, Wagistrasse 12, 8952 Schlieren, Switzerland. Tel.: +41 44 634 5610, E-mail: [maximilian.emmert@irem.uzh.ch](mailto:maximilian.emmert@irem.uzh.ch)

## Material and Methods

### Scanning electron microscopy (SEM)

SEM was used to assess and confirm the degree of endothelialization for the two TEHVs designs (JACC, Emmert). Briefly, samples were fixed in 2% glutaraldehyde (Sigma-Aldrich; Switzerland), dehydrated with a sequence of different EtOH concentrations, and embedded in a solution of EtOH with increasing concentration of plastic components. Sections were then cut in an ultramicrotome and finally platinum-sputtered for imaging.

**Supplementary Table 1: Summary of the antibodies used for immunofluorescence.**

| <i>First-generation</i> TEHV  | Primary AB                                      | Secondary AB               |
|-------------------------------|-------------------------------------------------|----------------------------|
| <b>M1</b>                     | Rabbit anti-CCR7<br>(Abcam, ab32527)            | Goat anti-rabbit Alexa 568 |
| <b>M2</b>                     | Mouse anti-rat CD163<br>(Abd serotec, MCA342GA) | Goat anti-mouse Alexa 488  |
| <i>Second-generation</i> TEHV | Primary AB                                      | Secondary AB               |
| <b>M1</b>                     | Rabbit anti-CCR7<br>(Abcam, ab32527)            | Goat anti-rabbit Alexa 568 |
| <b>M2</b>                     | Mouse anti-rat CD163<br>(Abd serotec, MCA342GA) | Goat anti-mouse Alexa 488  |

**Supplementary Table 2: *First-* and *second-generation* TEHVs leaflet lengths and hinge thickness measurements.** Measurements are represented as mean value  $\pm$  standard deviation

| Follow-up [weeks] | <i>First-generation</i> TEHV  |                            |
|-------------------|-------------------------------|----------------------------|
|                   | Leaflet length [ $\mu$ m]     | Hinge thickness [ $\mu$ m] |
| <b>Control</b>    | 11533.33 $\pm$ 1042.43        | 754.17 $\pm$ 12.81         |
| <b>8</b>          | 9365.83 $\pm$ 273.14          | 1686.67 $\pm$ 784.39       |
| <b>16</b>         | 6597.16 $\pm$ 1703.23         | 2715 $\pm$ 700.72          |
| <b>24</b>         | 3612.916 $\pm$ 1848.99        | 2255.83 $\pm$ 355.41       |
|                   | <i>Second-generation</i> TEHV |                            |
|                   | Leaflet length [ $\mu$ m]     | Hinge thickness [ $\mu$ m] |
| <b>Control</b>    | 14451.43 $\pm$ 1081.86        | 870.57 $\pm$ 107.34        |
| <b>8</b>          | 11415.55 $\pm$ 2017.84        | 1996.67 $\pm$ 1001.77      |
| <b>52</b>         | 13538.33 $\pm$ 2014.32        | 651.33 $\pm$ 445.42        |

## Results

### Host cellular infiltration in *first-generation* TEHVs

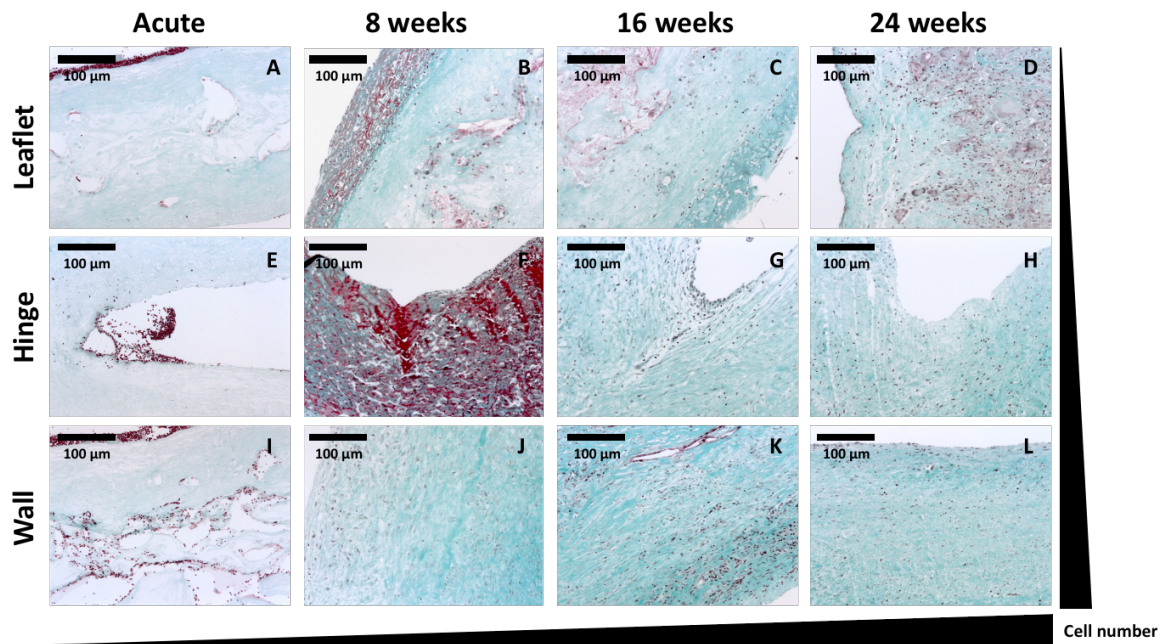

**Supplementary Figure 1: Representation of endogenous cellular infiltration in *first-generation* TEHVs.** Host cells gradually repopulate TEHVs over time starting from the wall and progressively migrating towards the hinge and the leaflet area (scale bars 100 μm).

## Endothelialization of *first-generation* TEHVs

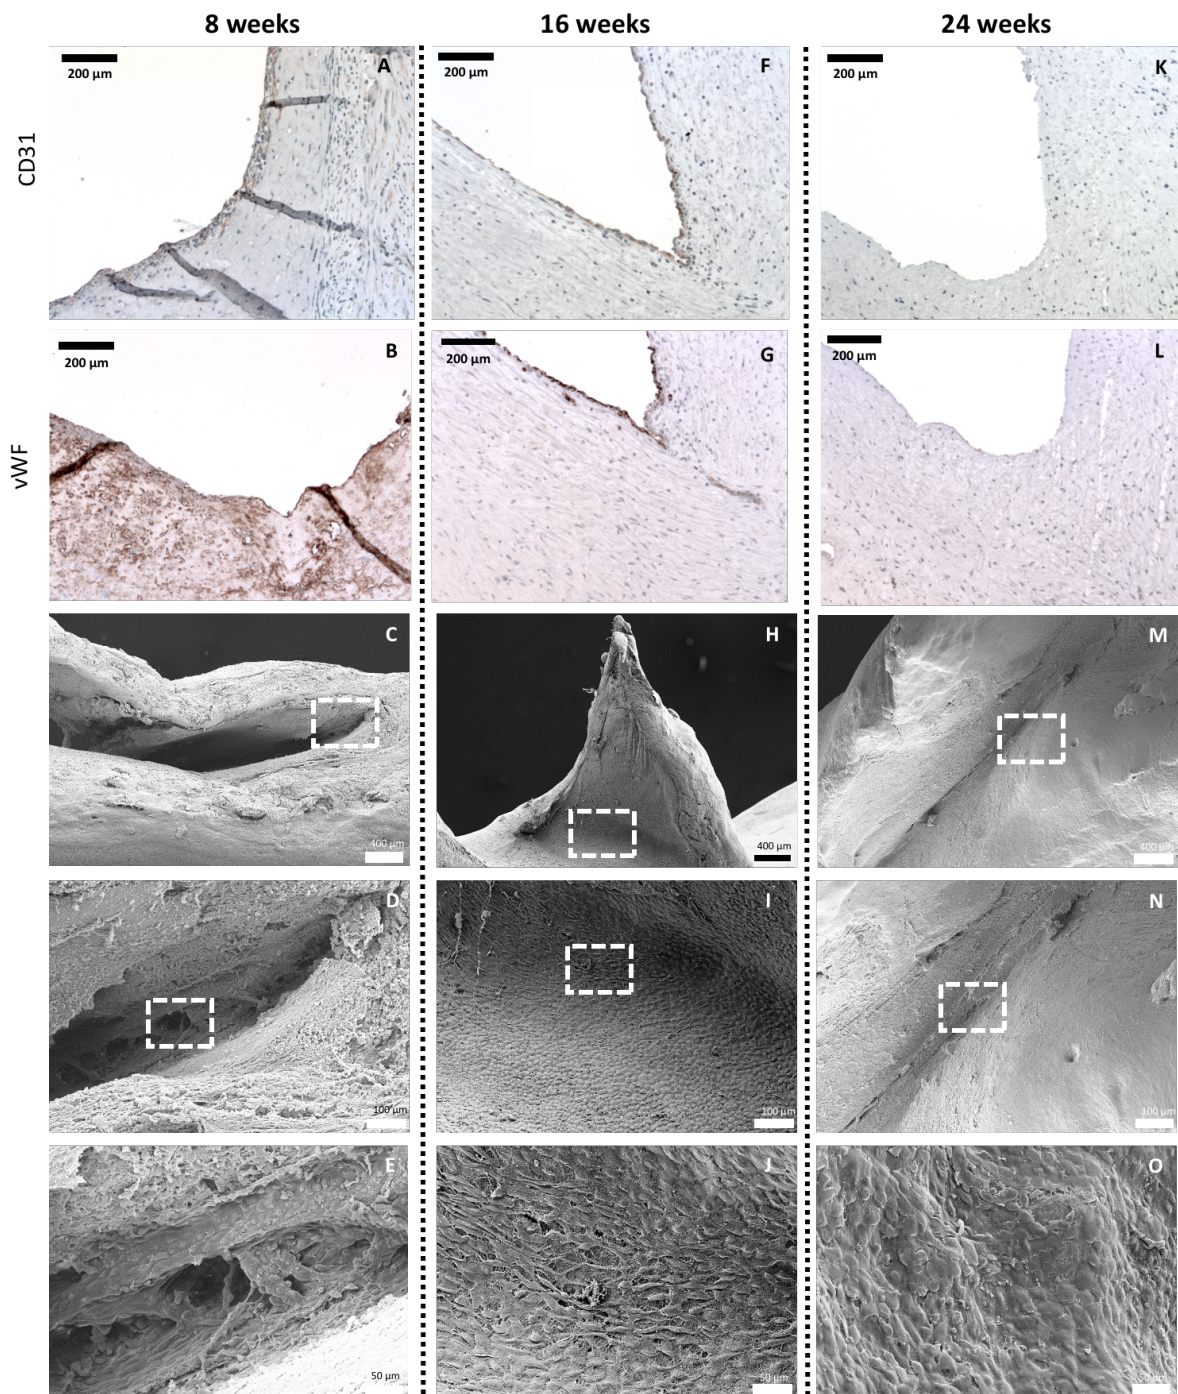

**Supplementary Figure 2: Assessment of endothelialization of *first-generation* TEHVs via immunohistochemistry and SEM imaging.** Images of the TEHVs hinge area stained for CD31 and vWF at different time-points (8, 16, and 24 weeks) (scale bars 100  $\mu$ m). SEM images of the hinge area of at different time-points (8, 16, and 24 weeks) and at three different magnifications. Endothelial cells are visible already at 8 weeks, but they form a confluent layer only at later time-points.

### Host cellular infiltration in *second-generation* TEHVs

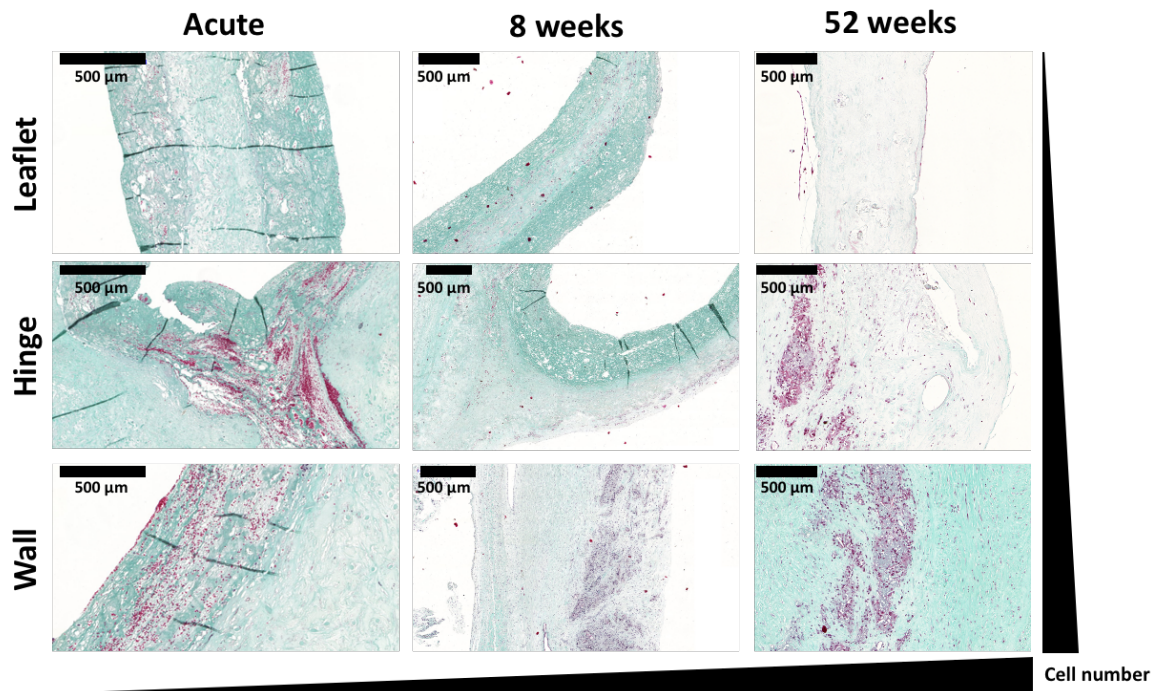

**Supplementary Figure 3: Representation of endogenous cellular infiltration in *second-generation* TEHVs.** Host cells gradually repopulate TEHVs over time starting from the wall and progressively migrating towards the hinge and the leaflet area (scale bars 500 μm).

## Endothelialization of *second-generation* TEHVs

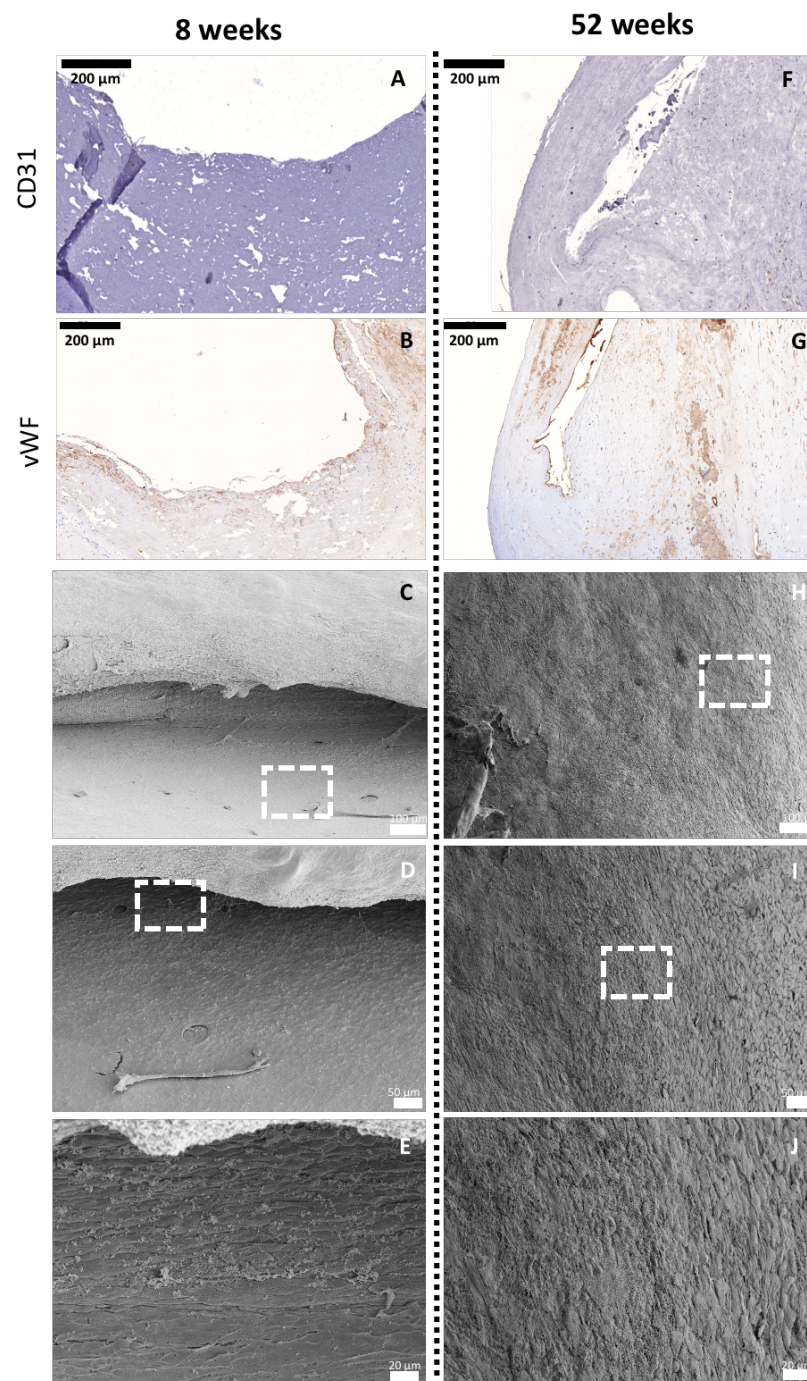

**Supplementary Figure 4: Characterization of endothelialization of *second-generation* TEHVs via immunohistochemistry and SEM imaging.** Images of the TEHVs hinge area stained for CD31 and vWF at different time-points (8 and 52 weeks). Endothelial cells are visible and lining the surface of TEHVs. Cutting artefacts might prevent the correct representation of endothelial cells presence at 8 and 52 weeks for the CD31 staining (scale bars 200 μm). SEM images of the hinge area of *second-generation* TEHVs at different time-points (8 and 52 weeks) and at different magnifications. A confluent and oriented endothelium is already visible at 8 weeks and retained also after 52 weeks in-vivo.
